# Supplementary material for: Characterizing leaf area index (LAI) and vertical foliage profile (VFP) over the United States
Source: Copernicus journal article supplement (doi:10.5194/bg-13-239-2016), 2016-01-15
Supplement: Supplementary file 1 [file bg-13-239-2016-supplement.pdf]

Supplement of Biogeosciences, 13, 239–252, 2016  
<http://www.biogeosciences.net/13/239/2016/>  
doi:10.5194/bg-13-239-2016-supplement  
© Author(s) 2016. CC Attribution 3.0 License.

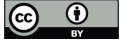

Biogeosciences  Open Access

*Supplement of*

## **Characterizing leaf area index (LAI) and vertical foliage profile (VFP) over the United States**

**H. Tang et al.**

*Correspondence to:* H. Tang (htang@umd.edu)

The copyright of individual parts of the supplement might differ from the CC-BY 3.0 licence.

## Supplement

Leaf Area Index (LAI) is derived from the footprint-level lidar waveform based on Beer's law (Equation S1), where  $P(0)$  is the total canopy gap fraction,  $G$  is the projection coefficient, and  $C$  is a clumping index which adjusts the linear relationship between effective LAI and true LAI (Chen et al. 1997). The term  $R_v(0)$  and  $R_g$  are the integrated laser energy returns from the canopy and ground respectively, and can be calculated using a Gaussian decomposition method (Hofton et al. 2000). The  $\rho_v/\rho_g$  is the ratio of canopy and ground reflectance, and can be estimated using a recursive method (Armston et al. 2013; Tang et al. 2014b).

Vertical Foliage Profile (VFP) is calculated as the integration of vertical foliage density from canopy height  $Z_1$  to  $Z_2$  (Equation S2), and the vertical foliage density is derived from the vertical distribution of canopy gap probability  $P(z)$  (Equation S3) (Ni-Meister et al. 2001; Tang et al. 2014a; Tang et al. 2012).

$$\text{LAI} = \frac{C}{G} * \ln(1 - P(0)) = \frac{C}{G} * \ln\left(1 + \frac{R_v(0)}{\frac{\rho_v}{\rho_g} * R_g}\right) \quad (\text{S1})$$

$$\text{VFP}(z_1 \sim z_2) = \int_{z_1}^{z_2} \frac{C}{G} * \frac{d \log P(z)}{dz} dz \quad (\text{S2})$$

$$P(z) = 1 - \frac{R_v(z)}{R_v(0)} \frac{1}{1 + \frac{\rho_v}{\rho_g} \frac{R_g}{R_v(0)}} \quad (\text{S3})$$

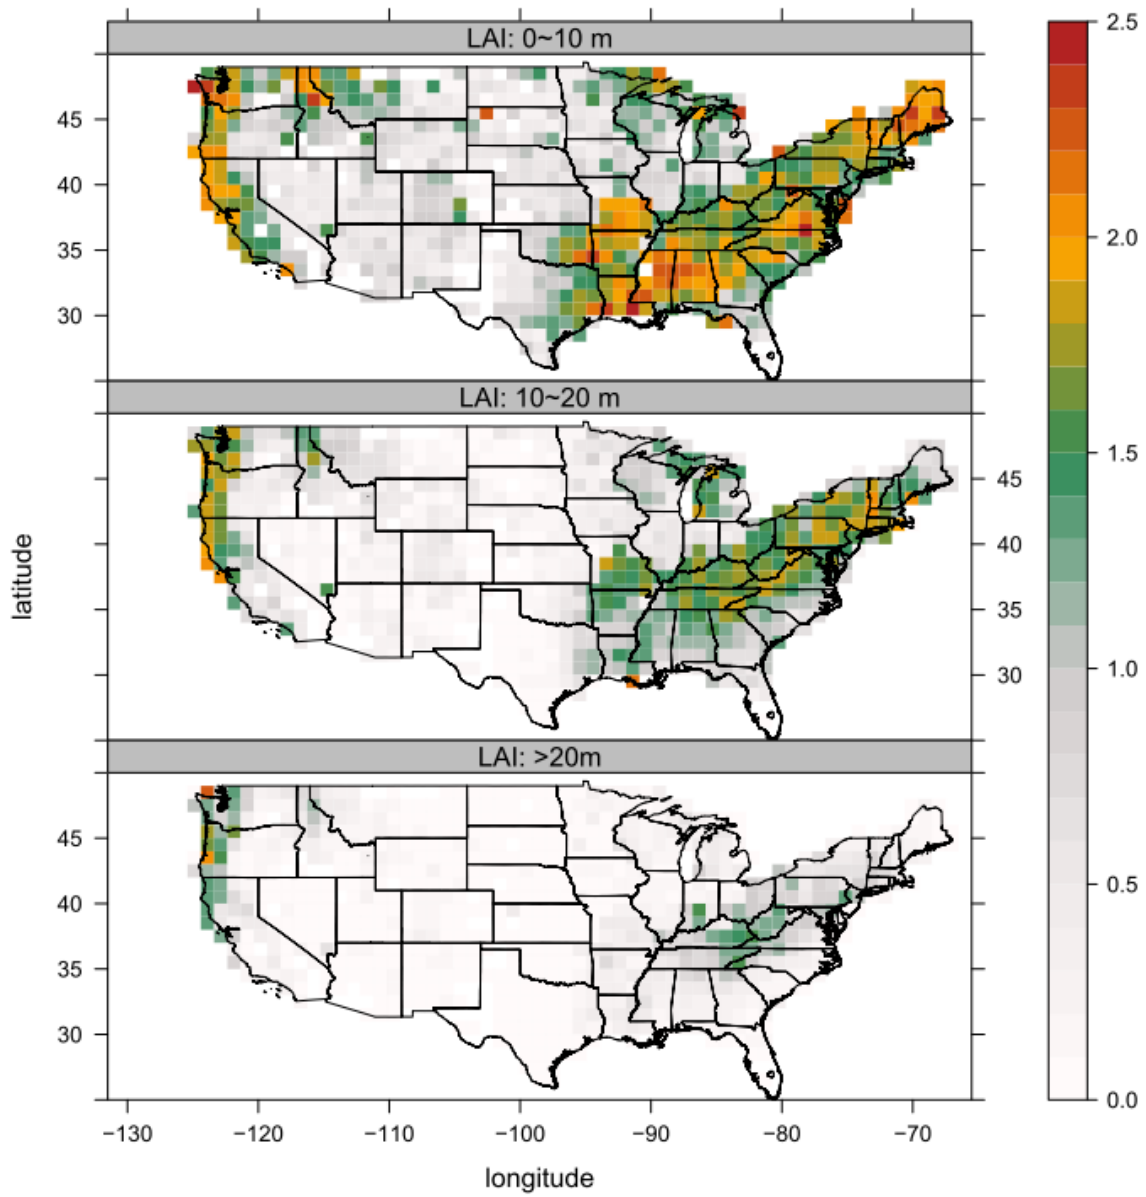

Figure S1. LAI strata distributions aggregated at 1 degree gridded cell. It shows similar spatial distributions of vertical LAI profiles towards those in Fig. 6.

## Reference

Armston, J., Disney, M., Lewis, P., Scarth, P., Phinn, S., Lucas, R., Bunting, P., & Goodwin, N. (2013). Direct retrieval of canopy gap probability using airborne waveform lidar. *Remote Sensing of Environment*, *134*, 24-38

Chen, J.M., Rich, P.M., Gower, S.T., Norman, J.M., & Plummer, S. (1997). Leaf area index of boreal forests: Theory, techniques, and measurements. *Journal of Geophysical Research*, *102*, 29429-29443

Hofton, M.A., Minster, J.B., & Blair, J.B. (2000). Decomposition of laser altimeter waveforms. *IEEE Transactions on Geoscience and Remote Sensing*, *38*, 1989-1996

Ni-Meister, W., Jupp, D.L.B., & Dubayah, R. (2001). Modeling lidar waveforms in heterogeneous and discrete canopies. *IEEE Transactions on Geoscience and Remote Sensing*, *39*, 1943-1958

Tang, H., Brolly, M., Zhao, F., Strahler, A.H., Schaaf, C.L., Ganguly, S., Zhang, G., & Dubayah, R. (2014a). Deriving and validating Leaf Area Index (LAI) at multiple spatial scales through lidar remote sensing: A case study in Sierra National Forest, CA. *Remote Sensing of Environment*, *143*, 131-141

Tang, H., Dubayah, R., Brolly, M., Ganguly, S., & Zhang, G. (2014b). Large-scale retrieval of leaf area index and vertical foliage profile from the spaceborne waveform lidar (GLAS/ICESat). *Remote Sensing of Environment*, *154*, 8-18

Tang, H., Dubayah, R., Swatantran, A., Hofton, M., Sheldon, S., Clark, D.B., & Blair, B. (2012). Retrieval of vertical LAI profiles over tropical rain forests using waveform lidar at La Selva, Costa Rica. *Remote Sensing of Environment*, *124*, 242-250
